# Supplementary material for: Synthesis and third order nonlinear optics of a new soluble conjugated porphyrin polymer
Source: Royal Society of Chemistry journal article supplement (doi:10.1039/b007250h), 2001-01-01
Supplement: b007250h.doc [file b007250h.doc]

**B007250H *Electronic Supplementary Information***

**Synthesis and third order nonlinear optics of a new soluble conjugated porphyrin polymer**

**Thomas E. O. Screen,*a* Katrina B. Lawton,*a* G. Scott Wilson,*a* Nicole Dolney,*b* Radu Ispasoiu,*b* Theodore Goodson III,*b* Simon J. Martin,*c* Donal D. C. Bradley*c†* and Harry L. Anderson**a***

*a Department of Chemistry, University of Oxford, Dyson Perrins Laboratory, South Parks Road, Oxford, UK OX1 3QY. E-mail: harry.anderson@chem.ox.ac.uk*

*b Department of Chemistry, Wayne State University, Detroit, MI 48202 USA.*

*c Department of Physics, University of Sheffield, Hick's Building, Hounsfield Road, Sheffield, UK S3 7HR.*

*†Current address: Department of Physics, Imperial College, London UK SW7 2BZ.*

Spectroscopic and analytical data for the compounds prepared in this work:

**Dipyrromethane (5).** mp 72–74 °C (lit.14 73 °C); **H (200 MHz; CDCl3) 7.56 (bs, 2 H, N*H* ), 6.63 (2 H, s), 6.26 (2 H, m), 6.15 (2 H, m, pyrrolic *H*), 3.96 (2 H, s methine *H*); *R*f = 0.47 (60–80. pet. ether/EtOAc/Et3N 5:1:0.1).

**Triisopropylsilylpropynal.** ** 0.94 gcm–3, **H (200 MHz; CDCl3) 9.20 (1 H, s), 1.09 (21 H, m); **C (50 MHz; CDCl3) 176.8, 104.6, 100.6, 19.3, 10.7.

**5,15-Bis((triisopropylsilyl)ethynyl)porphyrin (H26).** mp 283–285 °C; **max(CH2Cl2)/nm 422 (log ** 5.50), 529 (3.97), 570 (4.75), 607 (3.76), 662 (4.29); **max(KBr)/cm–1 2137 (C∫C); **H (200 MHz; CDCl3) 10.04 (2 H, s, *meso* *H*), 9.68 (4 H, d, *J* 4.7, *H*), 9.26 (4 H, d, *J* 4.7, *H*), 1.52–1.49 (42 H, m, TIPS *H*), –2.73 (2 H, s, N*H*); *m/z* (APCI+ ) 671.4 (M+); *R*f = 0.70 (60–80 pet. ether/CH2Cl2 2:1).

[**5,15-Bis((triisopropylsilyl)ethynyl)porphinato]magnesium(II) (Mg6)**. **max(CH2Cl2)/nm 430 (log ** 6.34), 577 (4.72), 624 (5.33); **max(KBr)/cm–1 2127 (C∫C); **H (200 MHz; CDCl3) 10.13 (2 H, s, *meso H*), 9.82 (4 H, d, *J* 4.4 , *H*), 9.33 (4 H, d, *J* 4.4 , *H*), 1.50–1.47 (42 H, m, TIPS *H*); **C (125.8 MHz; CDCl3, d5-pyridine) 152.54, 149.35, 132.56, 131.75, 110.59, 108.68, 101.04, 97.24, 19.39, 12.19; *R*f = 0.60 (60–80 pet. ether/CH2Cl2/Et3N 2:1:0.1); *m/z* (APCI+) 693.3 (M+).

[**5,15-Dibromo-10,20-bis((triisopropylsilyl)ethynyl)porphinato]magnesium(II) (Mg7).** **max(CH2Cl2)/nm 428 (log ** 4.32), 447 (5.42), 600 (3.92), 655 (4.27); **max(KBr)/cm–1 2140 (C∫C); **H (500 MHz; CDCl3) 9.62 (4 H, *J* 4.4, *H*), 9.57 (4 H, *J* 4.4, *H*), 1.58–1.48 (42 H, m, TIPS *H*); **C (125.8 MHz; CDCl3) 152.92, 149.88, 134.00, 132.76, 109.63, 107.74, 103.34, 99.09, 19.36, 12.14; *m/z* (FAB) 850 (M+), 771 (M+–Br), 690 (M+–2Br); *R*f = 0.43 (CH2Cl2/60–80 pet. ether/Et3N 1:2:0.1).

**5,15-Dibromo-10,20-bis((triisopropylsilyl)ethynyl)porphyrin (H27)**. mp > 300 °C; (Found: C, 60.9; H, 6.3; N, 6.8. C42H52N4Si2 requires C, 60.9; H, 6.4; N, 6.8); **max(CH2Cl2)/nm 438 (log ** 6.04), 551 (4.52), 590 (5.20), 632 (4.21), 694 (4.74); **max(KBr)/cm–1 2137 (C∫C); **H (200 MHz; CDCl3) 9.50 (4 H, d, *J* 5.3, *H*), 9.42 (4 H, d, *J* 5.3, *H*), 1.49 (42 H, m, TIPS *H*), –2.9 (2 H, br s, N*H*); *R*f = 0.63 (CH2Cl2/60–80 pet. ether/Et3N 1:2:0.1).

[**5,15-Dibromo-10,20-bis((triisopropylsilyl)ethynyl)porphinato]zinc(II) (Zn7).** mp > 300 °C; (Found: C, 68.9; H, 7.3; N, 7.6. C42H50N4Si2Zn requires C, 68.7; H, 7.1; N, 7.6); **max(CH2Cl2)/nm 428 (log ** 5.60), 568 (4.00), 612 (4.51); **max(KBr)/cm–1 2130 (C∫C); **H (200 MHz; CDCl3) 9.52 (4 H, d, *J* 4.5, *H*), 9.48 (4 H, d, *J* 4.5, *H*), 1.54–1.48 (42 H, m, TIPS *H*); **C (125.8 MHz; CDCl3, d5-pyridine) 152.79, 149.86, 133.51, 132.27, 109.20, 106.51, 102.11, 98.55, 19.04, 11.82; *m/z* (APCI+) 894.4 (MH+), 813.8 (MH+–Br), 733.4 (MH+–2Br); *R*f = 0.44 (60–80 pet. ether/CH2Cl2 2:1).

[**5,15-Diethynyl-10,20-bis((triisopropylsilyl)ethynyl)porphinato]zinc(II) (Zn9)***. *max(CH2Cl2)/nm 436 (log ** 4.66), 458 (5.54), 602 (4.10), 648 (4.19); **max(NaCl)/cm–1 2097 (weak, C∫C), 2140 (medium, C∫C), 3310 (strong, C∫C-H); **H (500 MHz; CDCl3) 9.65 (8 H, AB quartet, *J* 4.4, 6.3, *H*), 4.61 (2 H, s), 1.52–1.46 (42 H, m, TIPS *H*); **C (125.8 MHz; CDCl3) 152.74, 152.41, 132.07, 131.92, 109.43, 102.86, 101.10, 98.66, 86.20, 83.89, 19.35, 12.12; *m/z* (FAB) 782.3 (M+); *R*f = 0.33 (60–80 pet. ether/CH2Cl2 2:1).

***N*,*N*,*N*',*N*'-tetra-(2-ethylhexyl)-5-iodo-iso-phthalamide** **(11)**. **max(NaCl)/cm–1 1639 (C=O); **H (200 MHz; CDCl3) 7.70 (2 H, d, *J* 1.4 , aryl *H*), 7.23 (1 H, t, *J* 1.4, aryl *H*), 3.40 (4 H, d, *J* 7.0 , NC*H*2), 3.12 (4 H, d, *J* 7.0, NC*H*2), 1.77–0.65 (60 H, m, alkyl *H*); **C (50 MHz; CDCl3) 170.20, 139.49 (*C*H), 136.79, 124.70 (*C*H), 94.13, 52.42 + 46.79 (N*C*H2), 37.35 + 36.46 (*C*H), 30.54 + 30.19 (*C*H2), 28.50 (*C*H2), 23.82 + 23.38 (*C*H2), 22.97 + 22.81 (*C*H2), 13.92 (*C*H3), 10.55 (*C*H3); *m/z* (APCI+) 740.9 (MH+); *R*f = 0.85 (CH2Cl2/MeOH 10:1).

***N*,*N*,*N'*,*N'*-tetra-(2-ethylhexyl)-5-trimethylsilylethynyl-iso-phthalamide** **(12)**. **max(NaCl)/cm–1 2158 (C∫C), 1636 (C=O); **H (200 MHz; CDCl3) 7.35 (2 H, s, aryl *H*), 7.14 (1 H, s, aryl *H*), 3.33 (4 H, br d, *J* 6.0, NC*H*2), 3.05 (4 H, br d, *J* 6.0, NC*H*2), 1.8–0.6 (60 H, m, alkyl *H* ), 0.15 (9 H, TMS *H*); **C (50.8 MHz; CDCl3) 170.97, 137.87, 131.22 (*C*H), 125.42 (*C*H), 124.08, 103.45, 96.04, 52.38 + 46.64 (N*C*H2), 37.27 + 36.40 (*C*H), 30.46 + 30.07 (*C*H2), 28.39 (*C*H2), 23.75 + 23.32 (*C*H2), 22.87 + 22.72 (*C*H2), 13.77 (*C*H3), 10.53 + 10.39 (*C*H3); –0.51 (3 C, *C*H3); *m/z* (APCI+) 709.7 (M+); *R*f = 0.85 (CH2Cl2/MeOH 10:1).

***N*,*N*,*N'*,*N'*-tetra-(2-ethylhexyl)-5-ethynyl-isophthalamide** **(13).** **max(NaCl)/cm–1 3310 (C∫C-H), 2250 (C∫C), 1636 (C=O); **H (200 MHz; CDCl3) 7.45 (2 H, s, aryl *H*), 7.25 (1 H, s, aryl *H*), 3.37 (4 H, br s, NC*H*2), 3.13 (1 H, s, acetylene *H*), 3.09 (4 H, d, *J* 7.1 Hz, NC*H*2), 1.74–0.64 (60 H, m, alkyl *H*); **C(50.8 MHz; CDCl3) 170.96, 138.06, 131.47 (*C*H), 125.87 (*C*H), 123.10, 82.14, 78.84 (*C*H), 52.47 + 46.74 (*C*H2), 37.32 + 36.44 (*C*H), 30.51 + 30.16 (*C*H2), 28.48 (*C*H2), 23.79 + 23.37 (*C*H2), 22.94 + 22.76 (*C*H2), 13.88 (*C*H3), 10.56 (*C*H3); *m/z* (FAB) 638 (MH+); *R*f= 0.73 (CH2Cl2/EtOAc 10:1).

[**5,15-Bis**(***N*,*N*,*N'*,*N'*-tetra-(2-ethylhexyl)-5-ethynyl-**i**sophthalamide)-10,20-bis((tri-iso-propylsilyl)ethynyl)porphinato]Zn(II) (Zn14).** **max(CH2Cl2)/nm 328 (log **4.41), 472 (5.56), 613 (4.13), 665 (4.52); **max(KBr)/cm–1 2198 and 2139 (C∫C), 1619 (C=O); **H (500 MHz; CDCl3, d5-pyridine) 9.68 (4 H, d, *J* 4.4, *H*), 9.65 (4 H, d, *J* 4.4, *H*), 8.04 (4 H, d, *J* 1.4, aryl *H*), 7.41 (2 H, t, *J* 1.4, aryl *H*), 3.55 (8 H, m, NC*H*2), 3.33 (8 H, d, *J* 7.0, NC*H*2), 1.91–0.82 (162 H, m, remaining alkyl and TIPS *H*); **C (125.8 MHz; CDCl3, d5-pyridine) 171.28, 152.65, 152.11, 138.52, 132.11 (*C*H), 131.60 (*C*H), 130.95 (*C*H), 125.38 (*C*H), 125.19, 109.33, 103.45, 102.06, 98.97, 95.33, 94.53, 53.01 + 47.20 (*C*H2), 37.83 + 36.93 (*C*H), 31.01 + 30.70 (*C*H2), 28.98 (*C*H2), 24.34–23.91 (*C*H2), 23.42 + 23.24 (*C*H2), 19.32 (*C*H3), 14.40 + 14.27 (*C*H3), 12.12 (*C*H) 11.14 + 10.99 (*C*H3);*m/z* (FAB) 2003.5 (M+); *R*f= 0.57 (CH2Cl2/ 4% MeOH).

[**5,15-Bis**(***N*,*N*,*N'*,*N'*-tetra-(2-ethylhexyl)-5-ethynyl-isophthalamide)-10,20-bis(ethynyl)porphinato]Zn(II) (Zn15).** **max(CHCl3)/nm 328 (log ** 4.37), 470 (5.40), 610 (4.08), 663 (4.38); **max(KBr)/cm–1 3311 (C-H), 2198 (medium, C∫C), 2097 (weak, C∫C), 1638 (C=O); **H (500 MHz; CDCl3, d5-pyridine) 9.43 (8 H, unresolved AB quartet, *H*), 8.13 (4 H, s, aryl *H*), 7.45 (2 H, s, aryl *H*), 4.19 (2 H, s, acetylene H), 3.59 (8 H, m, NC*H*2), 3.38 (8 H, d, *J* 6.2, NC*H*2) 1.94–0.86 (120 H, m, alkyl *H*); **C (125.8 MHZ; CDCl3, d5-pyridine) 171.30, 151.79, 151.56, 138.45, 131.57 (*C*H), 131.17 (*C*H), 131.03 (*C*H), 125.43 (*C*H), 125.19, 101.40, 101.14, 95.11, 94.57, 86.00, 84.28 (*C*H), 53.00 + 47.19 (*C*H2), 37.79 + 36.91 (*C*H), 31.00 + 30.68 (*C*H2), 28.95 (*C*H2), 24.34–23.90 (*C*H2), 23.38 + 23.21 (*C*H2), 14.36 + 14.25 (*C*H3), 11.11 + 10.97 (*C*H3); *m/z* (FAB) 1691.9 (M+); *R*f= 0.45 (CH2Cl2/ 4% MeOH).

**Polymer (4)**. Found: C, 76.2: H, 8.7: N, 6.6. [C108H150N8O4Zn]n requires C, 76.7: H, 8.9: N, 6.6. **max(CHCl3/1% pyridine)/nm 481 (log ** 5.02), 532 (4.96), 698 (4.38), 815 (4.38); **max(KBr)/cm–1 2177 and 2121 (C∫C), 1634 (C=O); **H (500 MHz; CDCl3, d5-pyridine) 9.98 (4 H, s, *H*), 9.83 (4 H, s, *H*), 8.13 (4 H, s, aryl *H*), 7.45 (2 H, s, aryl *H*), 3.55 (8 H, br s, NC*H*2), 3.36 (8 C, br s, NC*H*2), 1.94–0.93 (120 H, m, alkyl *H*); **C (125.8 MHz; CDCl3, d5-pyridine) 171.06, 153.24, 152.21, 138.47, 132.18, 131.00 (8 C, *C*), 125.58, 124.92, 103.20, 102.28, 95.58, 93.87, 87.70, 82.80, 52.80 + 47.02 (*C*H2), 37.65 + 36.74 (*C*H), 30.84 + 30.52 (*C*H2), 28.78 (*C*H2), 24.16 + 23.76 (*C*H2), 23.25 + 23.13 (*C*H2), 14.25 + 14.20 (*C*H3), 11.01 + 10.84 (*C*H3); *m/z* (MALDI) 5097 (trimer M+, calc. 5071), 6824 (tetramer M+, calc. 6761), 8533 (pentamer M+, calc. 8451), 10236 (hexamer M+, calc. 10141), 11940 (heptamer M+, calc. 11831); 13600 (octamer M+, calc. 13520); 15285 (nonamer M+, calc. 15210); 17005 (decamer M+, calc. 16900); 18732 (11-mer M+, calc. 18590); 20375 (12-mer M+, calc. 20280); 22048 (13-mer M+, calc. 21969); GPC (THF) *M*n = 53,000; *M*w = 119,000.

***meso*-*meso’*-[5,15-Bis(*N*,*N*,*N'*,*N'*-tetra-(2-ethylhexyl)-5-ethynyl-isophthalamide)-10-((tri-iso-propylsilyl)ethynyl)porphinato]Zn(II) Dimer (Zn217).** **max(CH2Cl2/1% pyridine)/nm 486 (log ** 6.18), 525 (5.76), 693 (5.52), 744 (5.34); **max(KBr)/cm–1 2193, 2137 (C∫C), 1639 (C=O); **H (500 MHz; CDCl3, d5-pyridine) 9.92 (4 H, d, *J* 4.6, *H*), 9.76 (4 H, d, *J* 4.6, *H*), 9.72 (4 H, d, *J* 4.5, *H*), 9.69 (4 H, d, *J* 4.5, *H*), 8.08 (8 H, s, aryl *H*), 7.42 (4 H, s, aryl *H*), 3.54 (16 H, m, NC*H*2), 3.34 (16 H, d, *J* 6.5, NC*H*2) 1.90–0.82 (198 H, m, alkyl *H*); **C(125.8 MHz; CDCl3, d5-pyridine) 171.25, 153.41, 152.64, 152.45, 151.99, 138.55, 132.31, 132.10, 132.02, 131.76, 131.04, 125.48, 125.12, 109.22, 104.35, 102.68, 101.43, 99.54, 95.50, 94.30, 87.57, 82.47, 53.00 + 47.21 (N*C*H2), 37.83 + 36.93 (*C*H), 31.01 + 30.69 (*C*H2), 28.96 (*C*H2), 24.35 + 23.91 (*C*H2), 23.40 + 23.24 (*C*H2), 19.34 (*C*H3), 14.39 + 14.29 (*C*H3), 12.15 (*C*H), 11.14 + 11.01 (*C*H3); *m/z* (FAB) 3694.4 (M+).
